# Supplementary material
Source: Springer Nature journal article supplement (https://www.springermedizin.de/resource/supplementary/12877_2013_976_MOESM3_ESM.docx/9440844)
Supplement: MOESM3 [file 9440844]

**Table 3: Explanatory variables for IADL functional capacity**

| **VARIABLES**  **(N=424)** | | **Crude OR** | **95% Confidence Interval** | **Adjusted OR** | **95%**  **Confidence Interval** |
| --- | --- | --- | --- | --- | --- |
| **Sociodemographic** |  |  |  |  |  |
| Level of Education | Illiterate | 3.92 | (2.14 – 7.20) | 3.32 | (1.39 – 7.90) |
| Up to 4th Grade | 1.57 | (0.91 – 2.71) | 3.56 | (1.62 – 7.84) |
| Up to 8th Grade | 0.92 | (0.48 – 1.74) | 1.52 | (0.59 – 3.90) |
| Above 8th Grade | 1.00 | - | 1.00 | - |
| **Health Conditions and Lifestyle** |  |  |  |  |  |
| Has any healthcare professional ever told you that you have cancer or a malignant tumor, except for skin tumors (non-melanoma) | Yes | 8.07 | (1.07 – 60.93) | 11.22 | (1.15 – 109.13) |
| No | 1.00 | - | 1.00 | - |
| **Mobility Assessment** |  |  |  |  |  |
| What is the level of difficulty for walking 400 meters? | Impossible/Very Difficult | 26.94 | (13.40 – 54.17) | 39.50 | (14.86 – 105.0) |
| Moderately Difficult | 7.67 | (3.23 – 18.22) | 7.25 | (2.81 – 18.71) |
| Little Difficulty/None | 1.00 | - | 1.00 | - |
| **Sensory Aspect: Vision** |  |  |  |  |  |
| Wears glasses or contact lenses | Yes | 0.36 | (0.24 – 0.53) | 0.45 | (0.26 – 0,.7) |
| No | 1.00 | - | 1.00 | - |
| **Emotional Aspects** |  |  |  |  |  |
| Do you often feel abandoned? | Yes | 2.45 | (1.54 – 3.91) | 1.82 | (1.01 – 3.27) |
| No | 1-00 | - | 1,00 | - |
| Have you been feeling that you have more memory problems than other people your age? | Yes | 1.78 | (1.04 - 3.06) | 1.93 | (0.96 – 3.91) |
| No | 1.00 | - | 1.00 | - |
